# Supplementary material for: Porphyrin MOF nanosheets used for light-mediated multilevel memristive switching
Source: Royal Society of Chemistry journal article supplement (doi:10.1039/d4ce00889h), 2024-01-01
Supplement: d4ce00889h1.pdf [file d4ce00889h1.pdf]

## **Porphyrin MOF nanosheets used for light-mediated multilevel memristive switching**

Zhen Liu<sup>a†</sup>, Danli Song<sup>a†</sup>, Wen-Bo Pei<sup>b†</sup>, Liquan Wu<sup>a</sup>, Hong Xie<sup>a</sup>, Gaigai Cai<sup>a</sup>, Jiefei Yang<sup>a</sup>, Bing Zheng<sup>a\*</sup>, Wei-Wei Xiong<sup>a\*</sup>

<sup>a</sup>Key Laboratory of Flexible Electronics (KLOFE) & Institute of Advanced Materials (IAM), Nanjing Tech University, Nanjing 211816, P. R. China. E-mail address: iambzheng@njtech.edu.cn; iamwwxiong@njtech.edu.cn

<sup>b</sup>School of Chemistry and Molecular Engineering, Nanjing Tech University, Nanjing 211816, China.

† These authors contributed equally to this work

### **\* Corresponding author**

Prof. Bing Zheng

Postal address: 30 South Puzhu Road, Nanjing 211816, P. R. China

Tel: + 86 025 83587982; E-mail address: iambzheng@njtech.edu.cn

Prof. Wei-Wei Xiong

Postal address: 30 South Puzhu Road, Nanjing 211816, P. R. China

Tel: + 86 025 83587982; E-mail address: iamwwxiong@njtech.edu.cn

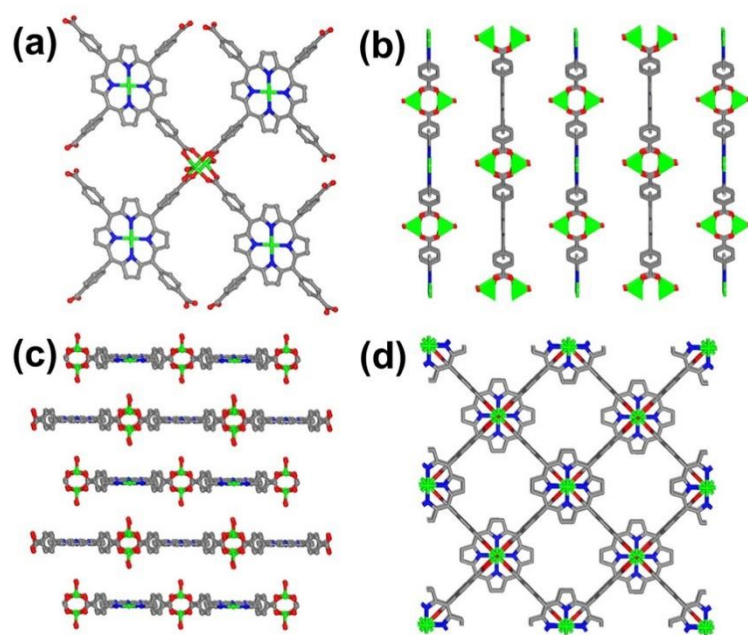

Figure S1. The structures of Zn-TCPP

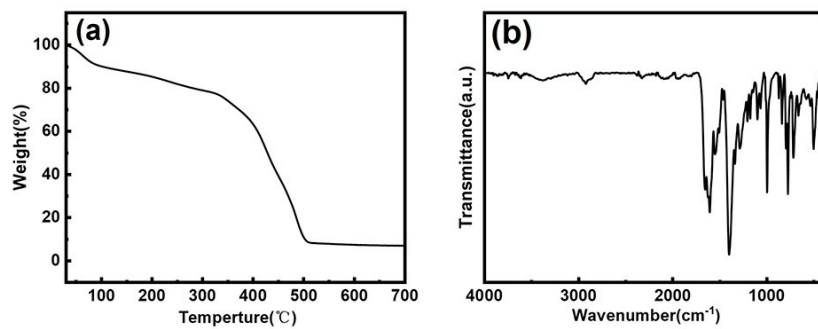

Figure S2. The TG and FTIR curves of Zn-TCPP

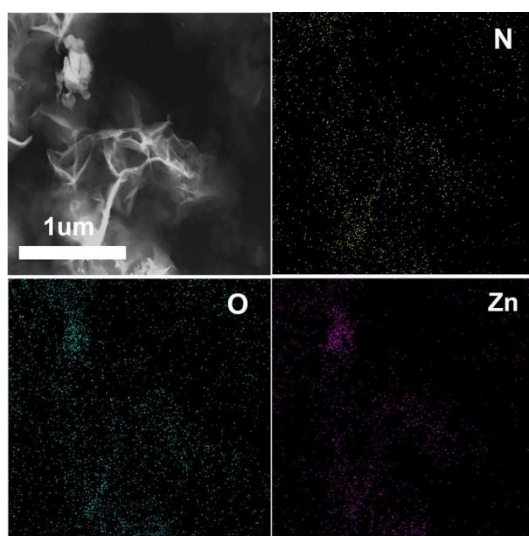

Figure S3. The elemental mapping images of Zn-TCPP

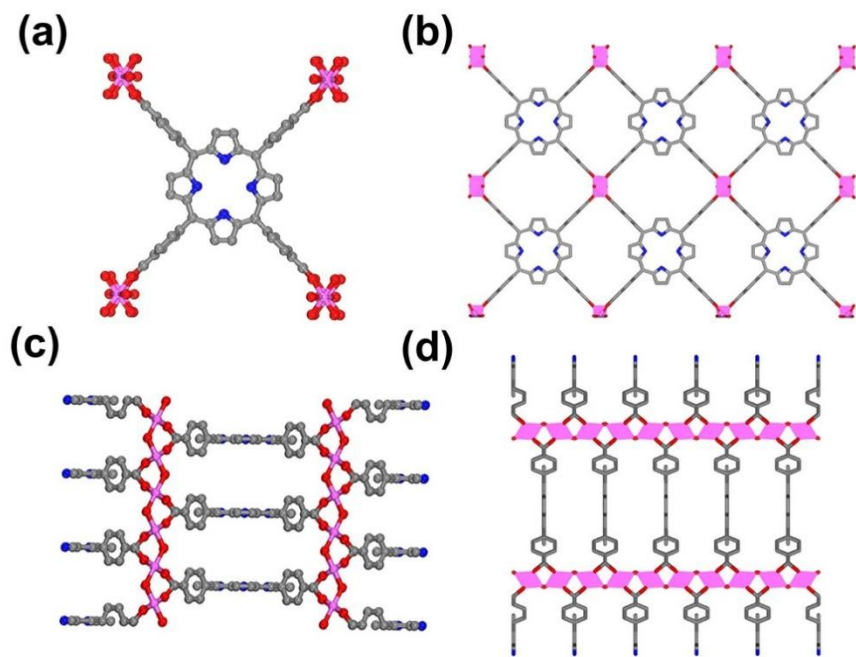

Figure S4. The structures of Al-TCPP

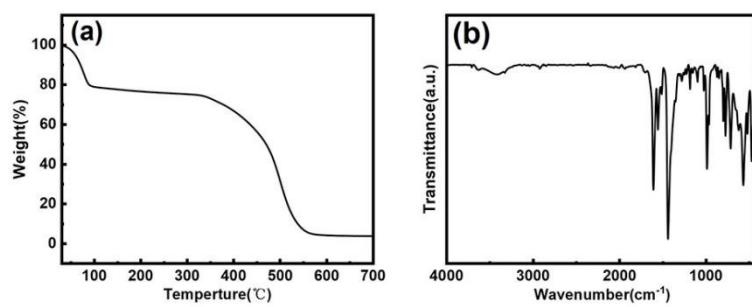

Figure S5. The TG and FTIR curves of Zn-TCPP

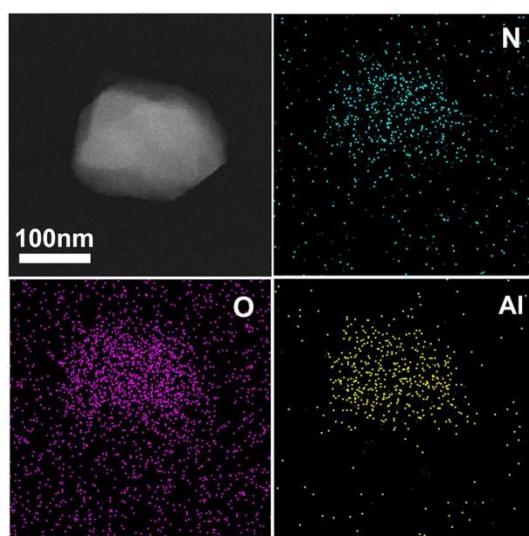

Figure S6. The elemental mapping images of Al-TCPP

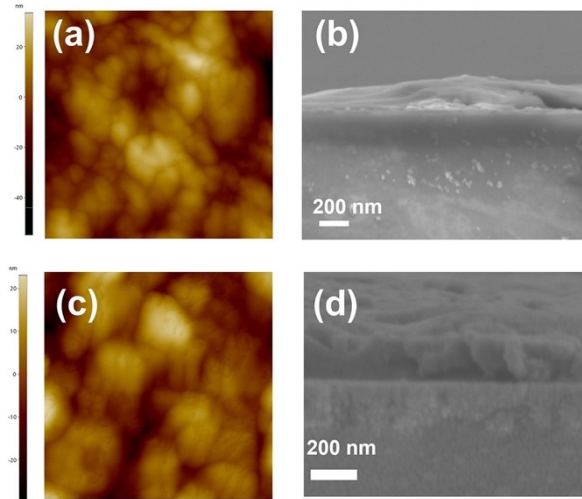

Figure S7. The roughness of the surface and the thickness of Zn-TCPP (a-b) and Al-TCPP (c-d)



## Motto-Schottky plots

Mott-Schottky plots were obtained from the flat band potential measurements of M-TCPP (M=Zn or Al). Generally, the Lowest Unoccupied Molecular Orbital (LUMO) in many n-type semiconductors is more negative than the flat band potential by 0.1-0.2 eV[1-2]. Herein, we set the voltage differences between the LUMO value and the flat band potential value to be 0.1 eV. Bandgap ( $E_g$ ) is the optical bandgap calculated from the onset of the UV-vis spectra. Highest Occupied Molecular Orbital (HOMO) and LUMO energy levels were calculated from the following equations:

$$E_{\text{HOMO}} = E_{\text{LUMO}} - E_g.$$

$$E_g = 1240/\lambda_b$$

**Table S1. Band gap and energy band potentials of as-assembled samples**

| Material | Semiconductor type | Bandgap (eV) | Flat band (eV) | LUMO (eV) | HOMO (eV) |
|----------|--------------------|--------------|----------------|-----------|-----------|
| Zn-TCPP  | n-type             | 1.95         | -0.21          | -0.31     | 1.64      |
| Al-TCPP  |                    | 1.82         | -0.75          | -0.85     | 0.97      |

### Reference

1. 2D Metal–Organic Framework Nanosheets with Time-Dependent and Multilevel Memristive Switching. *Adv. Funct. Mater.*, DOI: 10.1002/adfm.201806637
2. Supramolecular Zinc Porphyrin Photocatalyst with Strong Reduction Ability and Robust Built-In Electric Field for Highly Efficient Hydrogen Production. *Adv. Energy Mater.*, DOI: 10.1002/aenm.202101392
